# Supplementary material for: The Mycobacterium tuberculosis CRISPR-Associated Cas1 Involves Persistence and Tolerance to Anti-Tubercular Drugs
Source: Hindawi journal article supplement (doi:10.1155/2019/7861695), 2019-04-02
Supplement: f1 [file 7861695.f1.zip]

Suppl. Table 1. Primers used in this study.

| Gene            | Sequence |                                                 |
|-----------------|----------|-------------------------------------------------|
| CRISPR loci 1   | F        | CACCGACACCCCGAACACCAC                           |
|                 | R        | CTCAACGCCAGAGACCAGC                             |
| CRISPR loci 2   | F        | TTAGGTCTCGCCTATACCTCCTCGATGAACCACC              |
|                 | R        | TCAGCGCAGAGGAGTTTGTG                            |
| Rv2817c-Rv2816c | F        | AAAGGTCTCACTTCATGGTGCAGCTGTATGTCTC              |
|                 | R        | TTAGGTCTCGCCTATCAAAAGAACACAAACTCC               |
| EcoCas1         | F        | TTgaattcATGCATCATCACCATCACCATGTGCAGCTGTATGTCTCG |
| HindCas1        | R        | GGaagcttTTAGGCTCCGGATGGCTC                      |

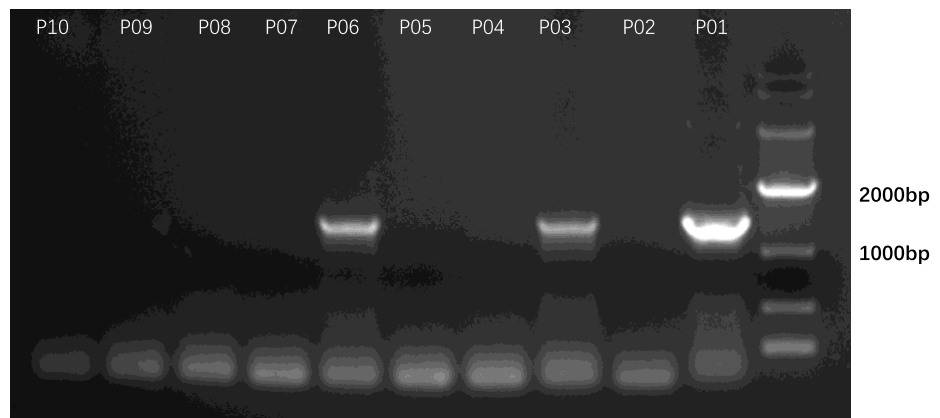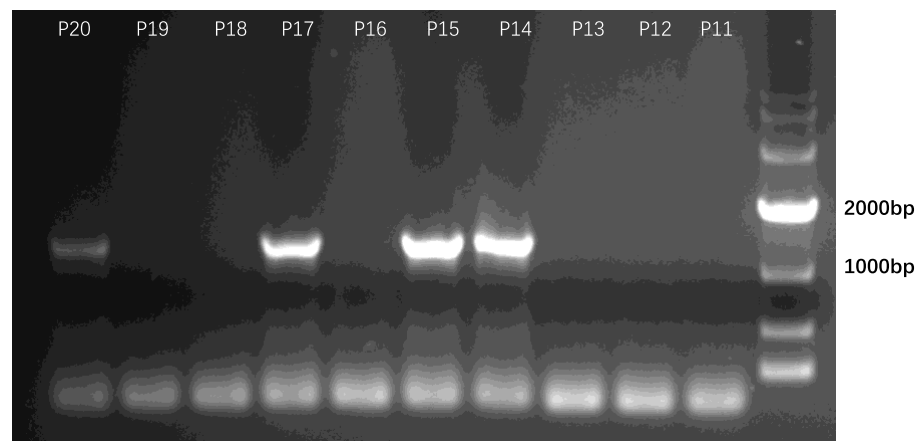

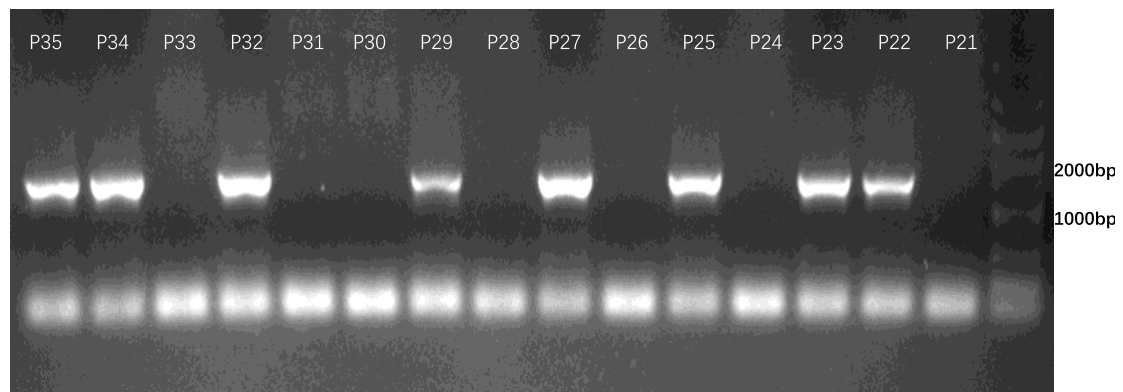

Suppl. Fig. 1. Detection of Cas1 gene (Rv2817c) in clinical isolates
